# Supplementary material
Source: MDPI journal article supplement (https://www.mdpi.com/1424-8247/16/12/1740)
Supplement: s1 [file s1]

**Table S1.** Baseline clinical and echocardiographic characteristics at admission according to discontinuation of betablockers within the first 24 h \*.

|                                               | Overall Population<br>(n = 286) | BB Non-Discontinued<br>(n = 63) | BB Discontinued<br>(n = 223) | p Value |
|-----------------------------------------------|---------------------------------|---------------------------------|------------------------------|---------|
| Age, mean ± SD, years                         | 68.7 ± 13.6                     | 69.4 ± 15.2                     | 68.5 ± 13.1                  | 0.34    |
| Male, n (%)                                   | 187 (65.4)                      | 28 (44.4)                       | 159 (71.3)                   | <0.01   |
| Body mass index, mean ± SD, kg/m <sup>2</sup> | 26 ± 5.7                        | 26.3 ± 6.4                      | 26 ± 5.5                     | 0.98    |
| Risk factors, n (%)                           |                                 |                                 |                              |         |
| Diabetes mellitus                             | 101 (35.3)                      | 23 (36.5)                       | 78 (35)                      | 0.88    |
| Hypertension                                  | 169 (59)                        | 39 (61.9)                       | 130 (58.3)                   | 0.66    |
| Dyslipidemia                                  | 134 (46.9)                      | 27 (42.9)                       | 107 (48)                     | 0.48    |
| Current smoker                                | 61 (22)                         | 17 (27.9)                       | 44 (20.4)                    | 0.22    |
| Medical history, n (%)                        |                                 |                                 |                              |         |
| Peripheral artery disease                     | 45 (15.7)                       | 8 (12.7)                        | 37 (16.6)                    | 0.56    |
| Chronic kidney disease                        | 88 (30.8)                       | 17 (27)                         | 71 (31.8)                    | 0.54    |
| COPD                                          | 22 (7.7)                        | 5 (8)                           | 17 (7.6)                     | 1       |
| ICD                                           | 68 (23.8)                       | 14 (22.2)                       | 54 (24.2)                    | 0.87    |
| Active cancer                                 | 18 (6.3)                        | 2 (3.2)                         | 16 (7.2)                     | 0.38    |
| Stroke                                        | 29 (10.1)                       | 8 (12.7)                        | 21 (9.4)                     | 0.48    |
| NYHA functional status, n (%)                 |                                 |                                 |                              |         |
| ≥ 3                                           | 119 (42.7)                      | 25 (40.3)                       | 94 (43.3)                    | 0.77    |
| History of cardiac disease, n (%)             |                                 |                                 |                              |         |
| All causes                                    | 223 (78)                        | 45 (71.4)                       | 178 (80)                     | 0.17    |
| Ischemic                                      | 125 (43.7)                      | 26 (41.3)                       | 99 (44.4)                    | 0.67    |
| Hypertrophic                                  | 8 (2.8)                         | 2 (3.2)                         | 6 (2.7)                      | 1       |
| Toxic                                         | 12 (4.2)                        | 3 (4.8)                         | 9 (4)                        | 0.73    |
| Dilated                                       | 44 (15.4)                       | 8 (12.7)                        | 36 (16.1)                    | 0.56    |
| Valvular                                      | 25 (8.7)                        | 5 (8)                           | 20 (9)                       | 1       |
| Hypertensive                                  | 11 (3.8)                        | 1 (1.6)                         | 10 (4.5)                     | 0.47    |
| Previous medications, n (%)                   |                                 |                                 |                              |         |
| Aspirin                                       | 129 (45.1)                      | 26 (41.3)                       | 103 (46.2)                   | 0.57    |
| P2Y12 inhibitors                              | 54 (18.9)                       | 7 (11.1)                        | 47 (21.1)                    | 0.1     |
| Oral anticoagulant (VKA or DOAC)              | 122 (42.7)                      | 30 (47.6)                       | 92 (41.3)                    | 0.39    |
| ACEi, ARB or ARNi                             | 168 (58.9)                      | 33 (53.2)                       | 135 (60.5)                   | 0.31    |
| Statins                                       | 153 (53.5)                      | 28 (44.4)                       | 125 (56.1)                   | 0.12    |
| Loop diuretics                                | 194 (67.8)                      | 44 (69.8)                       | 150 (67.3)                   | 0.76    |
| Aldosterone antagonist                        | 67 (23.4)                       | 8 (12.7)                        | 59 (26.5)                    | 0.03    |
| Cardiogenic Shock triggers, n (%)             |                                 |                                 |                              |         |

|                                        |                      |                        |                          |       |
|----------------------------------------|----------------------|------------------------|--------------------------|-------|
| Ischemic                               | 88 (30.8)            | 25 (39.7)              | 63 (28.3)                | 0.1   |
| Non-ischemic                           | 164 (57.3)           | 28 (44.4)              | 136 (61)                 |       |
| Supraventricular tachycardia           | 48 (16.8)            | 9 (14.3)               | 39 (17.5)                | 0.7   |
| Infectious disease                     | 31 (10.8)            | 6 (9.5)                | 25 (11.2)                | 0.82  |
| Ventricular arrhythmia                 | 34 (11.9)            | 9 (14.3)               | 25 (11.2)                | 0.51  |
| Iatrogenesis                           | 12 (4.2)             | 2 (3.2)                | 10 (4.5)                 | 1     |
| Non-observance                         | 22 (7.7)             | 1 (1.6)                | 21 (9.4)                 | 0.06  |
| Mechanical complications               | 7 (2.4)              | 1 (1.6)                | 6 (2.7)                  | 1     |
| Conduction disorder                    | 10 (3.5)             | 0 (0)                  | 10 (4.5)                 | 0.12  |
| Clinical presentation at admission     |                      |                        |                          |       |
| Heart rate, mean $\pm$ SD, bpm         | 91.2 $\pm$ 29.9      | 97 $\pm$ 34.6          | 89.5 $\pm$ 28.2          | 0.27  |
| SBP, mean $\pm$ SD, mmHg               | 100.8 $\pm$ 25.1     | 106.7 $\pm$ 20.7       | 99.1 $\pm$ 26            | <0.01 |
| Sinus rhythm, n (%)                    | 124 (43.4)           | 22 (34.9)              | 102 (45.7)               | 0.15  |
| Cardiac arrest, n (%)                  | 20 (7)               | 6 (9.5)                | 14 (6.3)                 | 0.4   |
| Blood tests at admission, median (IQR) |                      |                        |                          |       |
| Sodium, mmol/L                         | 135 (131.3–138)      | 136 (134–139.5)        | 135 (131–137)            | <0.01 |
| Creatinin, $\mu$ mol/L                 | 141 (97–202.8)       | 118 (83.5–176)         | 143 (106–205.5)          | 0.02  |
| Bilirubin, mg/L                        | 18 (10–29)           | 18 (10.3–30.8)         | 17 (10–28)               | 0.77  |
| Haemoglobin, g/dL                      | 12 (10.6–14)         | 12 (10.5–13.8)         | 12.1 (10.7–14)           | 0.39  |
| Arterial blood lactates, mmol/L        | 2.7 (2–4)            | 2.3 (1.9–3)            | 3 (2–4)                  | 0.02  |
| ASAT, UI/L                             | 71.5 (35–223)        | 49 (37–93)             | 78 (34–281.5)            | 0.15  |
| Nt-proBNP, pg/mL                       | 12,652 (5097–28,554) | 6787 (5228.5–18,347.5) | 12,710.5 (5073.3–29,692) | 0.5   |
| Baseline echocardiography              |                      |                        |                          |       |
| LVEF, mean $\pm$ SD, %                 | 27.2 $\pm$ 13.5      | 30.2 $\pm$ 13.4        | 26.3 $\pm$ 13.4          | 0.03  |
| TAPSE, median (IQR), mm                | 13 (10–16)           | 13 (10–16)             | 14 (10–16)               | 0.96  |
| PSVtdi, median (IQR), cm/s             | 7.5 (6–10)           | 7 (7–9.5)              | 8 (6–10)                 | 0.71  |
| Severe mitral regurgitation, n (%)     | 47 (17.1)            | 6 (9.7)                | 41 (19.2)                | 0.09  |
| Severe aortic stenosis, n (%)          | 12 (4.3)             | 4 (6.5)                | 8 (3.6)                  | 0.31  |
| Severe aortic regurgitation, n (%)     | 2 (0.7)              | 1 (1.6)                | 1 (0.5)                  | 0.4   |

\* The total number of participants may vary for certain variables due to missing data. \* ACE = angiotensin-converting enzyme, ARB = angiotensin receptor blocker, ARNi = angiotensin receptor II blocker-neprilysin inhibitor, ASAT = aspartate aminotransferase, BB = betablocker, COPD = chronic obstructive pulmonary disease, DOAC = direct oral anticoagulant ICD = implantable cardioverter-defibrillator, IQR = interquartile range, LVEF = left ventricular ejection fraction, NYHA = New York Heart Association, Nt-proBNP = N-terminal-pro hormone brain natriuretic peptide, PSVtdi = peak systolic velocity tissue Doppler imaging, SBP = systolic blood pressure, SD = standard deviation, TAPSE = tricuspid annular plane systolic excursion, VKA = vitamin K antagonists.

**Table S2.** In-hospital management according to discontinuation of betablockers within the first 24 h \*.

|                                                  | Overall Population<br>(n = 286) | BB Non-Discontinued<br>(n = 63) | BB Discontinued<br>(n = 223) | p Value |
|--------------------------------------------------|---------------------------------|---------------------------------|------------------------------|---------|
| Medications used, n (%)                          |                                 |                                 |                              |         |
| Dobutamine                                       | 226 (79.3)                      | 37 (58.7)                       | 189 (85.1)                   | <0.01   |
| Norepinephrine                                   | 128 (44.9)                      | 14 (22.2)                       | 114 (51.4)                   | <0.01   |
| Epinephrine                                      | 32 (11.2)                       | 5 (7.9)                         | 27 (12.1)                    | 0.5     |
| Levosimendan                                     | 22 (7.7)                        | 3 (4.8)                         | 19 (8.6)                     | 0.43    |
| Loop diuretics                                   | 203 (71)                        | 47 (74.6)                       | 156 (70)                     | 0.53    |
| Respiratory support, n (%)                       |                                 |                                 |                              |         |
| Non-invasive                                     | 74 (26)                         | 28 (44.4)                       | 46 (20.7)                    | <0.01   |
| Invasive                                         | 78 (27.4)                       | 8 (12.7)                        | 70 (31.5)                    | <0.01   |
| Short-term mechanical circulatory support, n (%) | 32 (11.3)                       | 3 (4.8)                         | 29 (13.1)                    | 0.07    |
| Renal replacement therapy, n (%)                 | 39 (13.6)                       | 5 (7.9)                         | 34 (15.2)                    | 0.15    |
| Any PCI, n (%)                                   | 64 (65.3)                       | 15 (83.3)                       | 49 (61.3)                    | 0.1     |

\* The total number of participants may vary for certain variables due to missing data. \* BB = betablocker, PCI = percutaneous coronary intervention.

**Table S3.** Baseline clinical and echocardiographic characteristics at admission according to early introduction of betablockers (early BB vs. non-early BB).

|                                               | Overall Population<br>(n = 407) | Early BB<br>(n = 32) | Non-Early BB<br>(n = 375) | p Value |
|-----------------------------------------------|---------------------------------|----------------------|---------------------------|---------|
| Age, mean ± SD, years                         | 64.1 ± 15                       | 66.2 ± 14.7          | 64 ± 15.1                 | 0.53    |
| Male, n (%)                                   | 308 (75.7)                      | 25 (78.1)            | 283 (75.5)                | 0.83    |
| Body mass index, mean ± SD, kg/m <sup>2</sup> | 25.5 ± 5.3                      | 26.9 ± 6.8           | 25.4 ± 5.1                | 0.31    |
| Risk factors, n (%)                           |                                 |                      |                           |         |
| Diabetes mellitus                             | 94 (23.2)                       | 13 (40.6)            | 81 (21.7)                 | 0.03    |
| Hypertension                                  | 160 (39.3)                      | 18 (56.3)            | 142 (37.9)                | 0.06    |
| Dyslipidemia                                  | 120 (29.5)                      | 13 (40.6)            | 107 (28.5)                | 0.16    |
| Current smoker                                | 122 (31.2)                      | 11 (34.4)            | 111 (30.9)                | 0.69    |
| Medical history, n (%)                        |                                 |                      |                           |         |
| Peripheral artery disease                     | 39 (9.6)                        | 5 (15.6)             | 34 (9.1)                  | 0.22    |
| Chronic kidney disease                        | 63 (15.5)                       | 4 (12.5)             | 59 (15.8)                 | 0.8     |
| COPD                                          | 22 (5.4)                        | 1 (3.1)              | 21 (5.6)                  | 1       |
| ICD                                           | 43 (10.6)                       | 4 (12.5)             | 39 (10.4)                 | 0.76    |
| Active cancer                                 | 29 (7.1)                        | 1 (3.1)              | 28 (7.5)                  | 0.72    |
| Stroke                                        | 25 (6.2)                        | 2 (6.3)              | 23 (6.1)                  | 1       |
| NYHA functional status, n (%)                 |                                 |                      |                           |         |
| ≥3                                            | 146 (36.8)                      | 9 (30)               | 137 (37.3)                | 0.55    |

|                                        |                |                    |                    |       |
|----------------------------------------|----------------|--------------------|--------------------|-------|
| History of cardiac disease, n (%)      |                |                    |                    |       |
| All causes                             | 169 (41.5)     | 12 (37.5)          | 157 (41.9)         | 0.71  |
| Ischemic                               | 80 (19.7)      | 9 (28.1)           | 71 (18.9)          | 0.37  |
| Hypertrophic                           | 3 (0.7)        | 0 (0)              | 3 (0.8)            | 1     |
| Toxic                                  | 17 (4.2)       | 1 (3.1)            | 16 (42.7)          | 1     |
| Dilated                                | 28 (6.9)       | 1 (3.1)            | 27 (7.2)           | 0.71  |
| Valvular                               | 33 (8.1)       | 0 (0)              | 33 (8.8)           | 0.09  |
| Hypertensive                           | 11 (2.7)       | 1 (3.1)            | 10 (2.7)           | 0.6   |
| Previous medications, n (%)            |                |                    |                    |       |
| Aspirin                                | 126 (31)       | 7 (21.9)           | 119 (31.7)         | 0.32  |
| P2Y12 inhibitors                       | 66 (16.2)      | 5 (15.6)           | 61 (16.3)          | 1     |
| Oral anticoagulant (VKA or DOAC)       | 79 (19.4)      | 9 (28.1)           | 70 (18.7)          | 0.24  |
| ACEi, ARB or ARNi                      | 102 (26.2)     | 13 (40.6)          | 89 (24.9)          | 0.06  |
| Statins                                | 103 (25.3)     | 9 (28.1)           | 94 (25.1)          | 0.68  |
| Loop diuretics                         | 146 (35.9)     | 12 (37.5)          | 134 (35.7)         | 0.85  |
| Aldosterone antagonist                 | 33 (8.1)       | 1 (3.1)            | 32 (8.5)           | 0.5   |
| Cardiogenic shock triggers, n (%)      |                |                    |                    |       |
| Ischemic                               | 166 (40.8)     | 17 (53.1)          | 149 (39.7)         | 0.19  |
| Non-ischemic                           | 201 (49.4)     | 16 (50)            | 185 (49.3)         |       |
| Supraventricular tachycardia           | 48 (11.8)      | 4 (12.5)           | 44 (11.7)          | 0.78  |
| Infectious disease                     | 49 (12)        | 2 (6.3)            | 47 (12.5)          | 0.4   |
| Ventricular arrhythmia                 | 52 (12.8)      | 6 (18.8)           | 46 (12.3)          | 0.28  |
| Iatrogenesis                           | 19 (4.7)       | 2 (6.3)            | 17 (4.5)           | 0.65  |
| Non-observance                         | 15 (3.7)       | 1 (3.1)            | 14 (3.7)           | 1     |
| Mechanical complications               | 14 (3.4)       | 1 (3.1)            | 13 (3.5)           | 1     |
| Conduction disorder                    | 4 (1)          | 0 (0)              | 4 (1.1)            | 1     |
| Clinical presentation at admission     |                |                    |                    |       |
| Heart rate, mean ± SD, bpm             | 98.4 ± 29.3    | 108.7 ± 37.7       | 97.5 ± 28.4        | 0.21  |
| SBP, mean ± SD, mmHg                   | 103 ± 25.1     | 111.2 ± 21.2       | 102.2 ± 25.3       | <0.01 |
| Sinus rhythm, n (%)                    | 231 (57.2)     | 13 (40.6)          | 218 (58.6)         | 0.06  |
| Cardiac arrest, n (%)                  | 46 (11.3)      | 5 (15.6)           | 41 (10.9)          | 0.39  |
| Blood tests at admission, median (IQR) |                |                    |                    |       |
| Sodium, mmol/L                         | 136 (132–139)  | 137 (132.8–140)    | 136 (132–139)      | 0.4   |
| Creatinin, µmol/L                      | 124 (93–172.8) | 113.5 (83.5–134.3) | 125 (93–179.5)     | 0.09  |
| Bilirubin, mg/L                        | 15 (9–28)      | 13.5 (10–26.3)     | 15 (9–28)          | 0.96  |
| Haemoglobin, g/dL                      | 13 (11–14.2)   | 12.1 (11.8–13)     | 13 (11–14.4)       | 0.22  |
| Arterial blood lactates, mmol/L        | 3 (2–5)        | 2 (1.7–2.9)        | 3 (2–5)            | 0.047 |
| ASAT, UI/L                             | 102 (42–360.3) | 82.5 (34.5–363)    | 102.5 (42.8–360.3) | 0.76  |

|                                    |                    |                        |                    |      |
|------------------------------------|--------------------|------------------------|--------------------|------|
| Nt-proBNP, pg/mL                   | 8388 (3357–21,306) | 4776.5 (1249.5–9155.5) | 8499 (3419–22,149) | 0.12 |
| Baseline echocardiography          |                    |                        |                    |      |
| LVEF, mean ± SD, %                 | 26.3 ± 13.1        | 29.4 ± 12.2            | 26 ± 13.2          | 0.08 |
| TAPSE, median (IQR), mm            | 13 (10–17)         | 12.5 (10.5–14)         | 13 (10–17)         | 0.67 |
| PSVtdi, median (IQR), cm/s         | 8 (6–10)           | 8 (8–10)               | 8.5 (6–10)         | 0.71 |
| Severe mitral regurgitation, n (%) | 49 (12.8)          | 2 (6.5)                | 47 (13.3)          | 0.4  |
| Severe aortic stenosis, n (%)      | 19 (4.8)           | 0 (0)                  | 19 (5.2)           | 0.38 |
| Severe aortic regurgitation, n (%) | 7 (1.8)            | 0 (0)                  | 7 (1.9)            | 1    |

The total number of participants may vary for certain variables due to missing data. ACE = angiotensin-converting enzyme, ARB = angiotensin receptor blockers, ARNi = angiotensin receptor II blocker-neprilysin inhibitor, ASAT = aspartate aminotransferase, BB = betablocker, COPD = chronic obstructive pulmonary disease, DOAC = direct oral anticoagulant ICD = implantable cardioverter–defibrillator, IQR = interquartile range, LVEF = left ventricular ejection fraction, NYHA = New York Heart Association, Nt-proBNP = N-terminal-pro hormone brain natriuretic peptide, PSVtdi = peak systolic velocity tissue Doppler imaging, SBP = systolic blood pressure, SD = standard deviation, TAPSE = tricuspid annular plane systolic excursion, VKA = vitamin K antagonists.

**Table S4.** In-hospital management according to early introduction of betablockers (early BB vs. non-early BB).

|                                                  | Overall Population<br>( <i>n</i> = 407) | Early BB<br>( <i>n</i> = 32) | Non-Early BB<br>( <i>n</i> = 375) | <i>p</i> Value |
|--------------------------------------------------|-----------------------------------------|------------------------------|-----------------------------------|----------------|
| Medications used, n (%)                          |                                         |                              |                                   |                |
| Dobutamine                                       | 340 (83.5)                              | 22 (31.3)                    | 318 (84.8)                        | 0.03           |
| Norepinephrine                                   | 233 (57.2)                              | 11 (34.4)                    | 222 (59.2)                        | <0.01          |
| Epinephrine                                      | 55 (13.5)                               | 5 (15.6)                     | 50 (13.3)                         | 0.79           |
| Levosimendan                                     | 28 (6.9)                                | 1 (3.1)                      | 27 (7.2)                          | 0.71           |
| Loop diuretics                                   | 264 (64.9)                              | 26 (81.3)                    | 238 (63.5)                        | 0.053          |
| Respiratory support, n (%)                       |                                         |                              |                                   |                |
| Non-invasive                                     | 110 (27)                                | 15 (46.9)                    | 95 (25.3)                         | 0.01           |
| Invasive                                         | 171 (42)                                | 7 (21.9)                     | 164 (43.7)                        | 0.02           |
| Short-term mechanical circulatory support, n (%) | 82 (20.1)                               | 6 (18.8)                     | 76 (20.3)                         | 1              |
| Renal replacement therapy, n (%)                 | 68 (16.7)                               | 2 (6.3)                      | 66 (17.6)                         | 0.14           |
| Any PCI, n (%)                                   | 143 (74.1)                              | 12 (66.7)                    | 131 (74.9)                        | 0.57           |

The total number of participants may vary for certain variables due to missing data. BB = betablocker, PCI = percutaneous coronary intervention.
